# Supplementary material for: eIF2α phosphorylation is required to prevent hepatocyte death and liver fibrosis in mice challenged with a high fructose diet
Source: PubMed Central journal article supplement (PMC5537942; doi:10.1186/s12986-017-0202-6), 2017-08-01

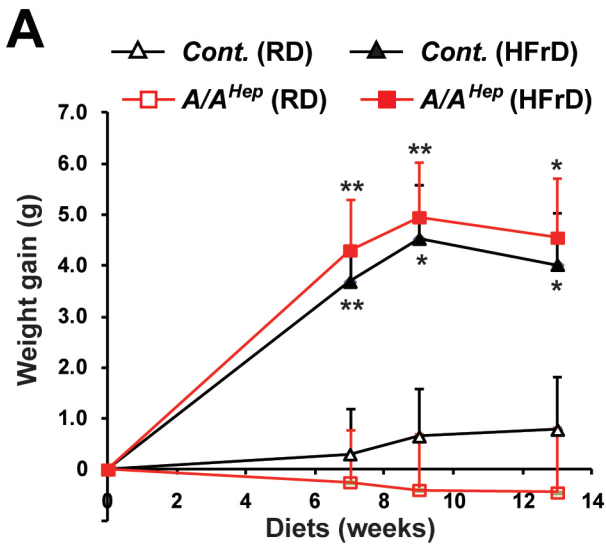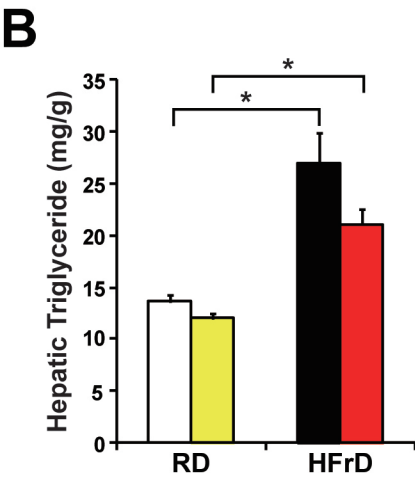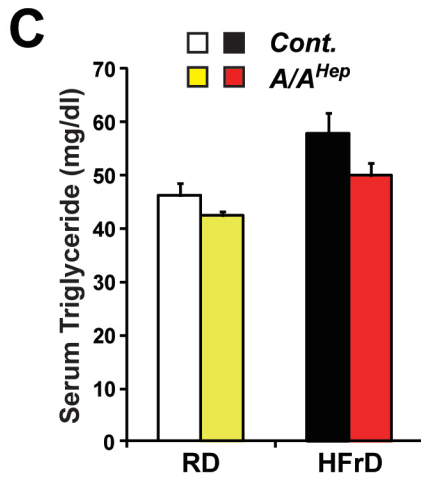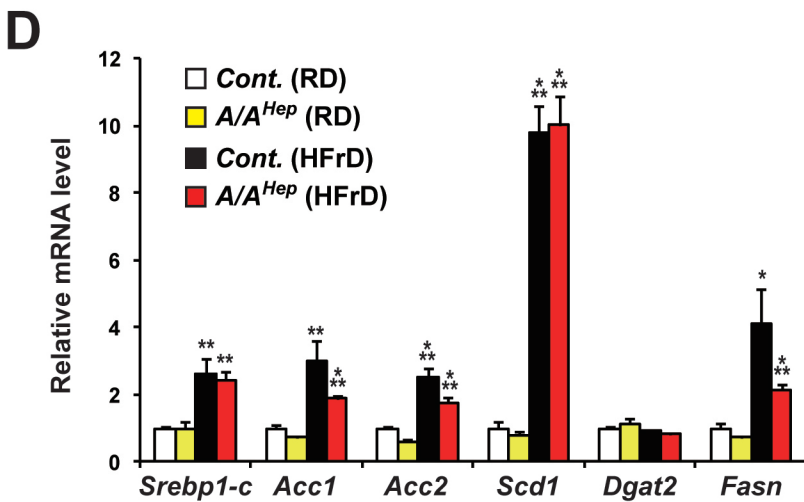

Supplement: 12986_2017_202_MOESM5_ESM.pdf [file 12986_2017_202_MOESM5_ESM.pdf]
