# Supplementary material for: eIF2α phosphorylation is required to prevent hepatocyte death and liver fibrosis in mice challenged with a high fructose diet
Source: Nutr Metab (Lond). 2017 Aug 1;14:48. doi: 10.1186/s12986-017-0202-6 (PMC5537942; doi:10.1186/s12986-017-0202-6)
Supplement: Supplementary file 3 — Survival ratio of young progeny (2 ~ 3 month old) from breeding of A/A;fTg/fTg X S/A;CRE Hep /0 mice. (XLSX 10 kb) [file 12986_2017_202_MOESM3_ESM.xlsx]

## Sheet: Sheet1
Additional File 3: Table S1. Survival ratio of young progeny (2~3 month old) from breeding of A/A;fTg/fTg X S/A;CREHep/0 mice
Genotype:	S/A;fTg/0 (S/A-Tg, Cont.)	S/A;fTg/0;CreHep/0 (S/AHep)	A/A;fTg/0 (A/A-fTg)	A/A;fTg/0;CreHep/0 (A/AHep)
Observed:	118/437 (0.27)	115/437 (0.26)	100/437 (0.23)	104/437 (0.24)
Expected frequency:	0.25	0.25	0.25	0.25
